# Supplementary material for: Spatial-Temporal Heterogeneity in Large Three-Dimensional Nanofibrillar Cellulose Hydrogel for Human Pluripotent Stem Cell Culture
Source: MDPI journal article supplement (doi:10.3390/gels9040324), 2023-04-12
Supplement: s1 [file s1]

# Spatial-Temporal Heterogeneity in Large Three-Dimensional Nanofibrillar Cellulose Hydrogel for Human Pluripotent Stem Cell Culture

Jin Hao <sup>1,2,†</sup>, Ying Chen <sup>1,2,†</sup>, Mingjian Zhu <sup>1,2</sup>, Yingqing Zhao <sup>1,2</sup>, Kai Zhang <sup>1,2</sup> and Xia Xu <sup>1,2,\*</sup>

<sup>1</sup> Biochemical Engineering Research Center, Anhui University of Technology, Ma'anshan 243002, China

<sup>2</sup> School of Chemistry and Chemical Engineering, Anhui University of Technology, Ma'anshan 243002, China

\* Correspondence: xiax@hotmail.com

† These authors contributed equally to this work.

## Table of Contents

|                                                                         |   |
|-------------------------------------------------------------------------|---|
| Figure S1 FTIR for cellulose .....                                      | 1 |
| Figure S2 Cell morphology in hydrogel with different thickness.....     | 2 |
| Figure S3 Cell viability after 1 day of culture .....                   | 3 |
| Figure S4 Cell viability after 3 day of culture .....                   | 4 |
| Figure S5 Score and loading plots of PCA at the different zones .....   | 5 |
| Figure S6 BSA and Dextran concentration change with time.....           | 6 |
| Figure S7 Solute distribution in hydrogel at 72 and 120 h.....          | 7 |
| Table S1 Global parameters and variables for the COMSOL simulation..... | 8 |
| Table S2 FTIR band assignment.....                                      | 9 |

## FTIR for cellulose

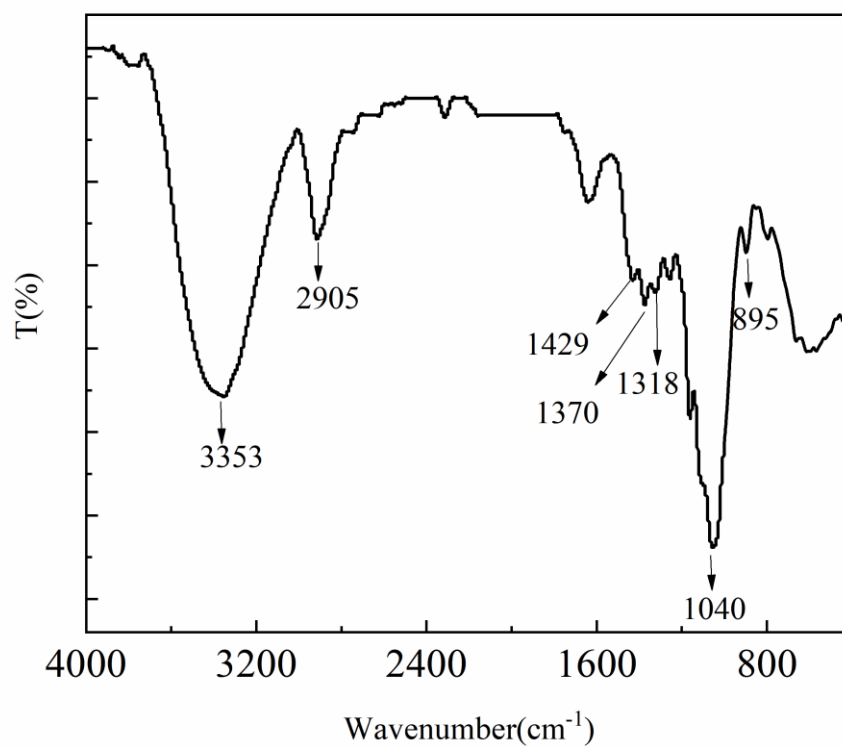

**Figure S1.** FTIR for cellulose.

## Cell morphology in hydrogel with different thickness

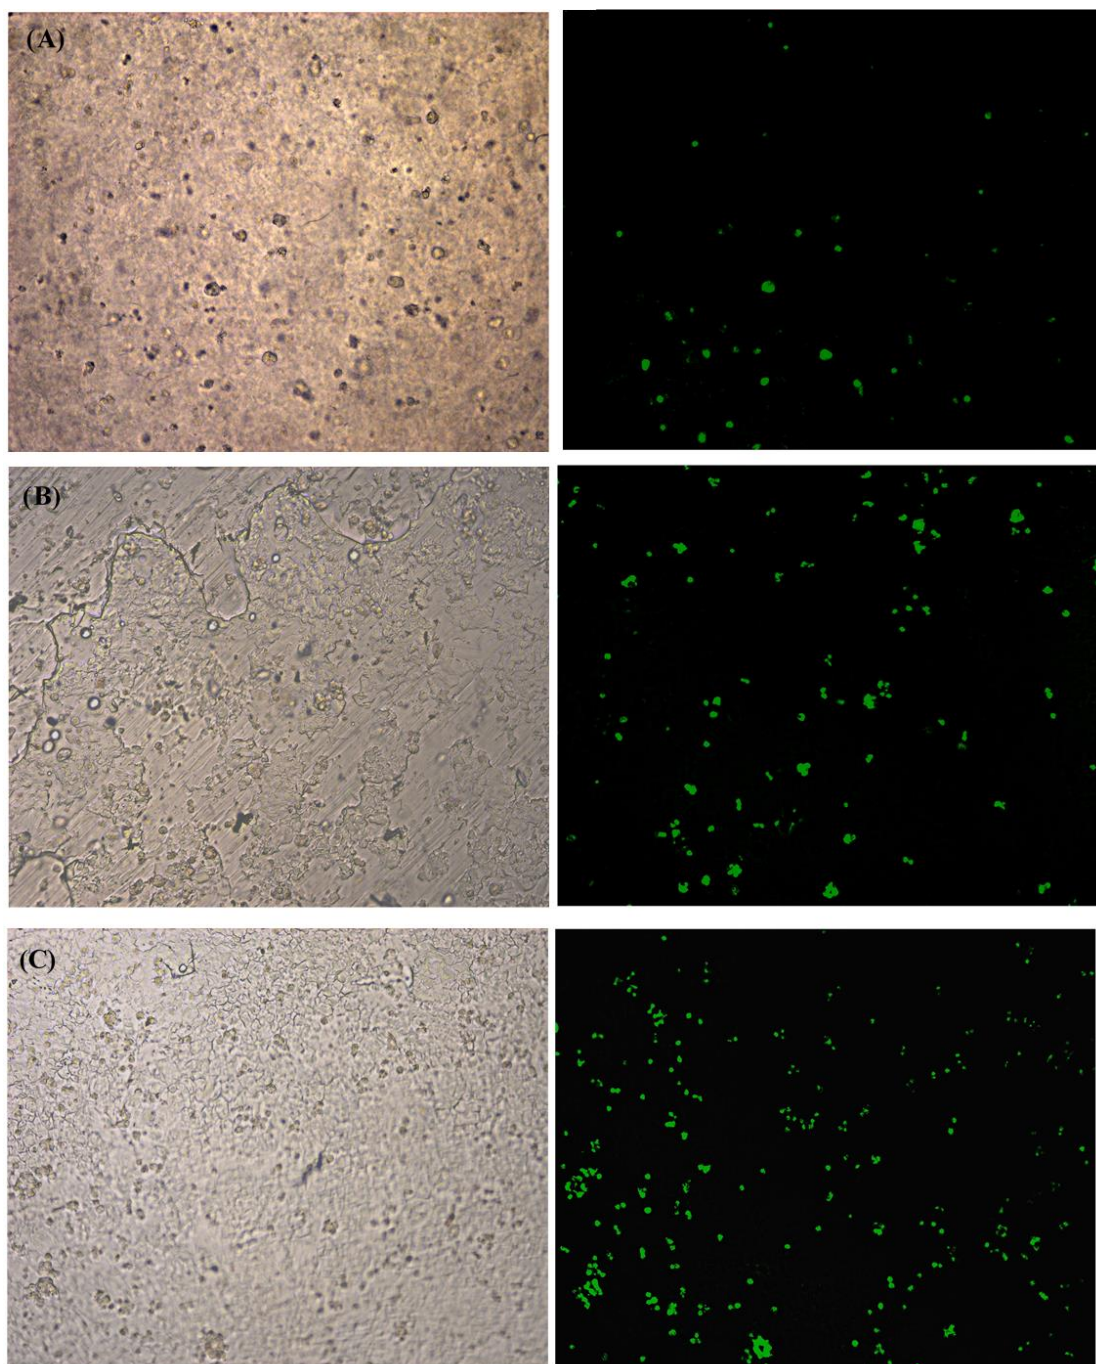

**Figure S2.** Cell morphology at day1 (A) 2mm (B) 3.5 mm (C) 5mm.

Cell viability after 1 day of culture

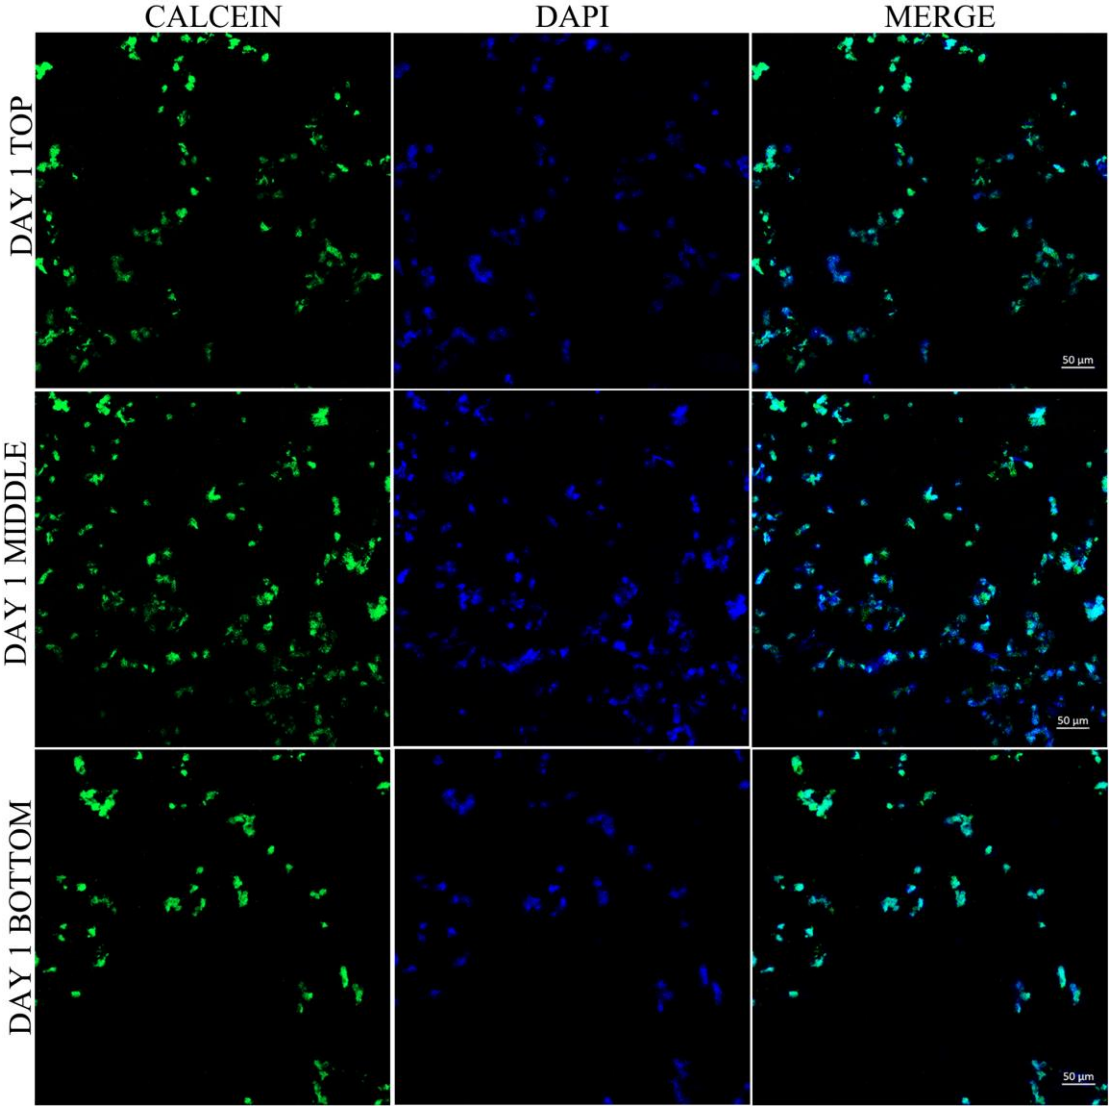

Figure S3. Cell viability at different locations after 1 day of culture.

## Cell viability after 3 day of culture

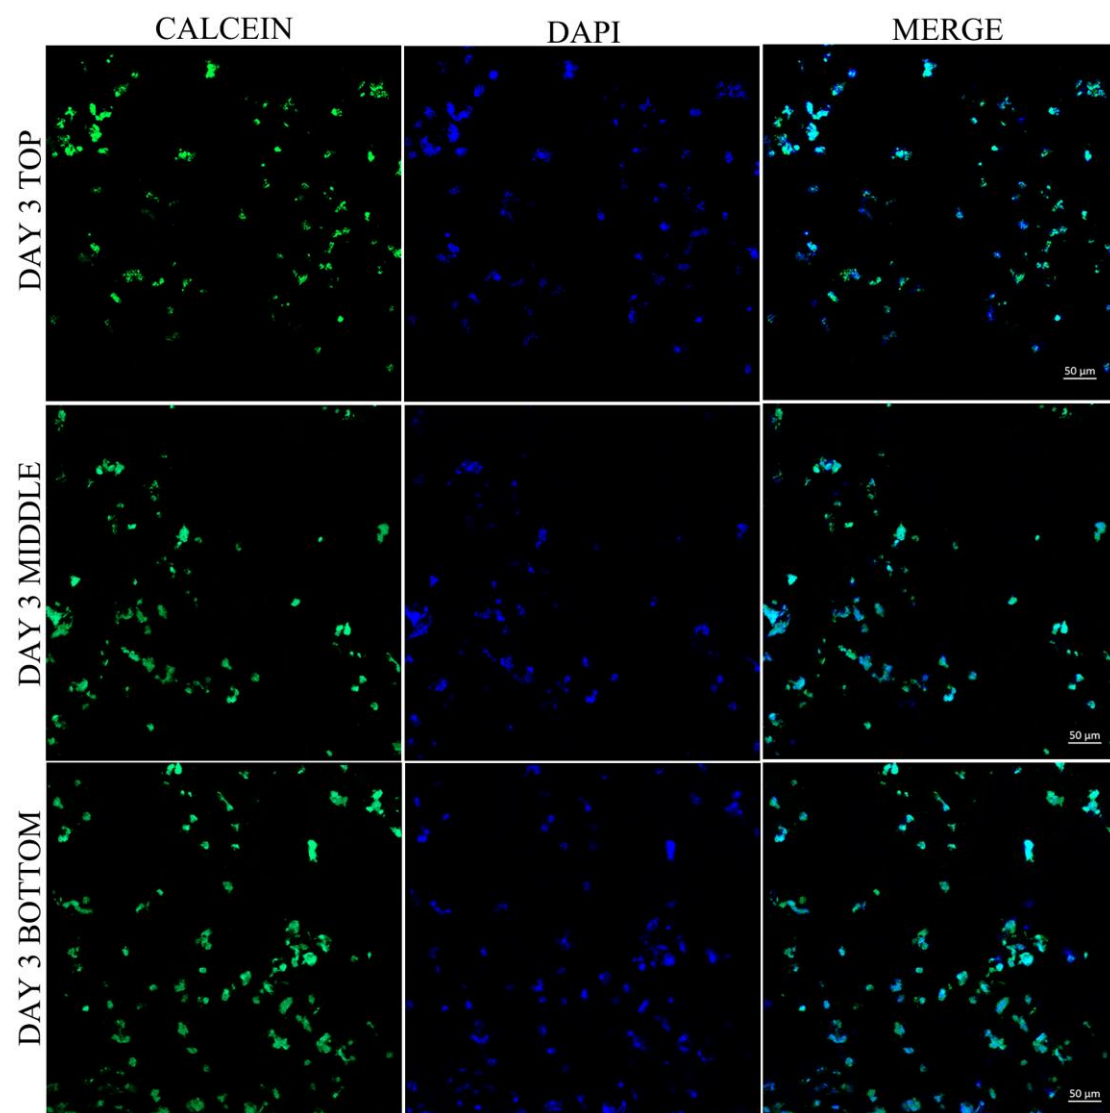

**Figure S4.** Cell viability after 3 days of culture.

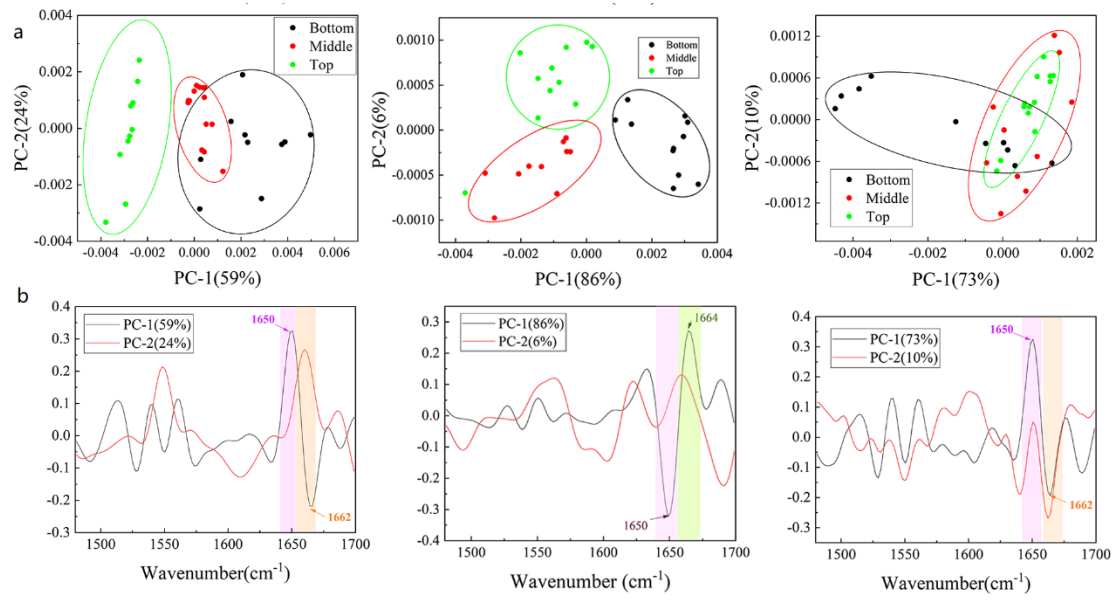

**Figure S5.** Score and loading plots of PCA at the different zones (left day 1, middle: day 3, right: day 5).

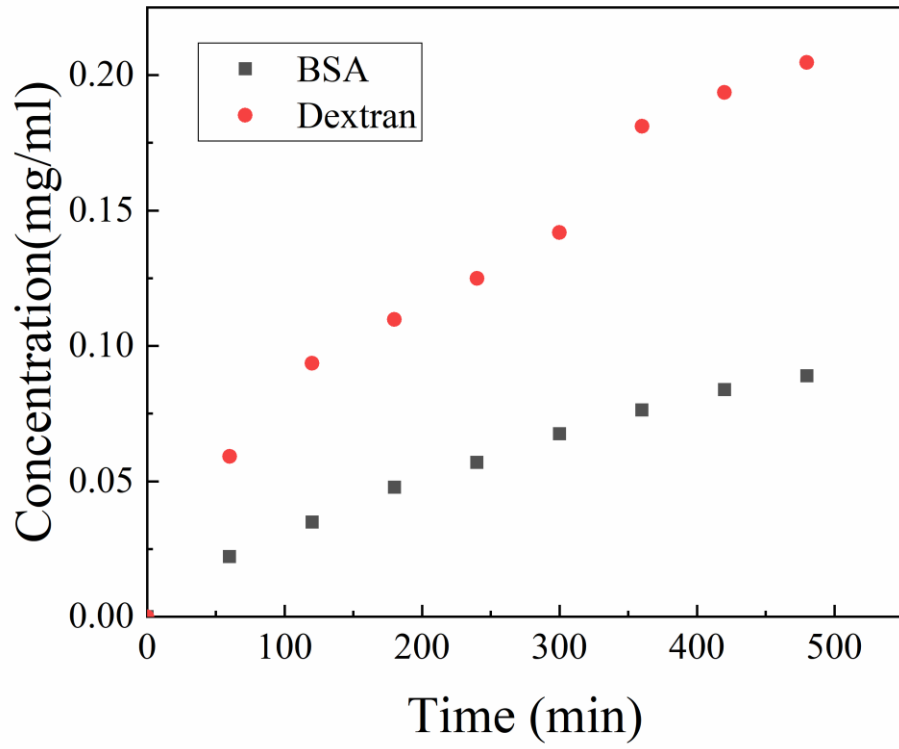

**Figure S6.** BSA and Dextran concentration change with time

### Solute distribution in hydrogel

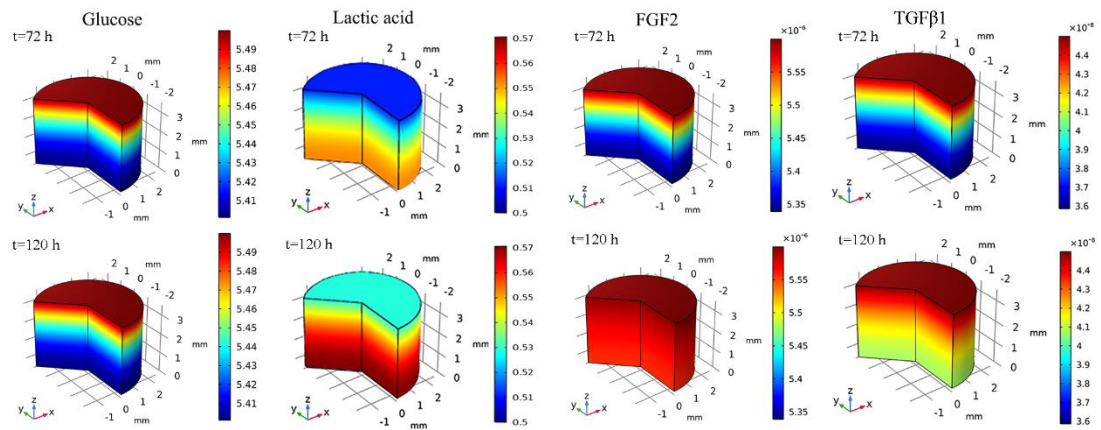

**Figure S7.** Solute distribution in hydrogel at 72 and 120 h

**Table S1.** Global parameters and variables for the COMSOL simulation.

| Parameter                   | Value                  | Unit                              | Annotation                       |
|-----------------------------|------------------------|-----------------------------------|----------------------------------|
| T                           | 310                    | K                                 | Temperature                      |
| $C_{g0, \text{glucose}}$    | 2.25                   | $\text{mol m}^{-3}$               | Initial glucose conc. in gel     |
| $C_{m0, \text{glucose}}$    | 5.5                    | $\text{mol m}^{-3}$               | Initial glucose conc. in media   |
| $C_{g, \text{glucose}}$     | Variable               | $\text{mol m}^{-3}$               | Local glucose conc. in gel       |
| $R_{\text{glucose}}$        | $1.108 \times 10^{-5}$ | $\text{mol s}^{-1} \text{m}^{-3}$ | Glucose uptake rate              |
| $C_{g0, \text{FGF2}}$       | $2.8 \times 10^{-6}$   | $\text{mol m}^{-3}$               | Initial FGF2 conc. in gel        |
| $C_{m0, \text{FGF2}}$       | $5.6 \times 10^{-6}$   | $\text{mol m}^{-3}$               | Initial FGF2 conc. in media      |
| $C_{g, \text{FGF2}}$        | Variable               | $\text{mol m}^{-3}$               | Real-time conc. of FGF2 in gel   |
| $C_{g0, \text{lacticacid}}$ | 0                      | $\text{mol m}^{-3}$               | Lactate conc. in gel             |
| $C_{m0, \text{lacticacid}}$ | 0                      | $\text{mol m}^{-3}$               | Lactate conc. in media           |
| $C_{g, \text{lacticacid}}$  | Variable               | $\text{mol m}^{-3}$               | local lactic acid conc. in gel   |
| $C_{m, \text{lacticacid}}$  | Variable               | $\text{mol m}^{-3}$               | local lactic acid conc. in media |
| $R_{\text{lacticacid}}$     | $1.108 \times 10^{-5}$ | $\text{mol s}^{-1} \text{m}^{-3}$ | Lactate production rate          |



**Table S2.** FTIR band assignment.

| Wavenumber/cm <sup>-1</sup> | Functional group assignment                                             | Biomolecule              |
|-----------------------------|-------------------------------------------------------------------------|--------------------------|
| 2970–2950                   | $\nu_{as} CH_3$                                                         | Lipid                    |
| 2935–2915                   | $\nu_{as} CH_2$                                                         | Lipid                    |
| 1742–1730                   | $\nu(C=O)$ carbonyl                                                     | Phospholipids            |
| 1674–1662                   | Amide I, turn&bands                                                     | Protein                  |
| 1650–1648                   | Amide I, $\nu C=O$ (70-85%) and $\nu C-N$ (10-20%) $\alpha$ -helix      | Protein                  |
| 1641–1633                   | Amide I, $\nu C=O$ (70-85%) and $\nu C-N$ (10-20%) $\beta$ -sheet       | Protein                  |
| 1570–1530                   | Amide II, $\delta N-H$ (40-60%), $\nu C-N$ (18-40%) and $\nu C-C$ (10%) | Protein                  |
| 1397                        | $\nu-COO-$                                                              | Lipid                    |
| 1379                        | $\delta_s CH_3$                                                         | Lipid                    |
| 1160                        | $\nu C-O$ and $\delta C-O-H$                                            | Carbohydrates            |
| 1099–1080                   | $\nu_s PO_2-$                                                           | DNA RNA<br>phospholipids |
| 1063                        | $\nu_s PO_2-, \nu C-C, \nu C-N$                                         | B-DNA                    |
| 996                         | RNA stretch and bend ring of uracil                                     | RNA                      |
